# Supplementary material for: Fucosylation and protein glycosylation create functional receptors for cholera toxin
Source: eLife journal article supplement (doi:10.7554/elife.09545), 2015-10-29
Supplement: supp [file elife_poa_e09545_Figure_9_figure_supplement_2.pdf › elife_poa_e09545_Figure_9_figure_supplement_2.pdf]

**A**

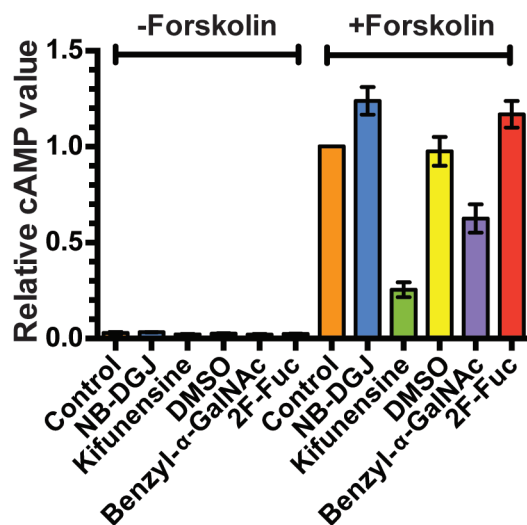

| 10 $\mu$ M Forskolin     | Max % Signal |
|--------------------------|--------------|
| Control                  | 100 $\pm$ 0% |
| NB-DGJ                   | 124 $\pm$ 7% |
| Kifunensine              | 25 $\pm$ 4%  |
| DMSO                     | 97 $\pm$ 8%  |
| Benzyl- $\alpha$ -GalNAc | 63 $\pm$ 7%  |
| 2F-Fuc                   | 117 $\pm$ 7% |

**B**

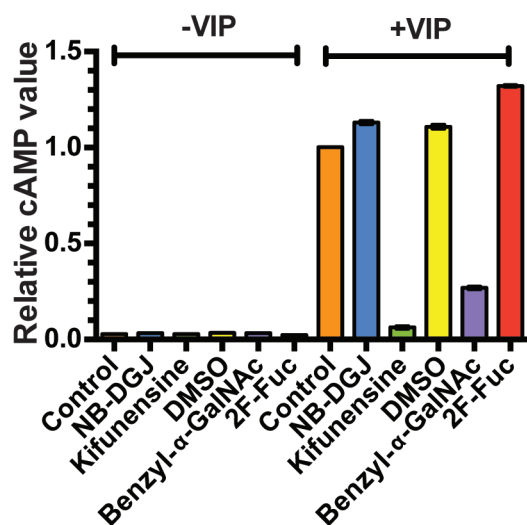

| 1 $\mu$ M VIP            | Max % Signal |
|--------------------------|--------------|
| Control                  | 100 $\pm$ 0% |
| NB-DGJ                   | 113 $\pm$ 1% |
| Kifunensine              | 6 $\pm$ 1%   |
| DMSO                     | 111 $\pm$ 1% |
| Benzyl- $\alpha$ -GalNAc | 27 $\pm$ 1%  |
| 2F-Fuc                   | 132 $\pm$ 0% |

**C**

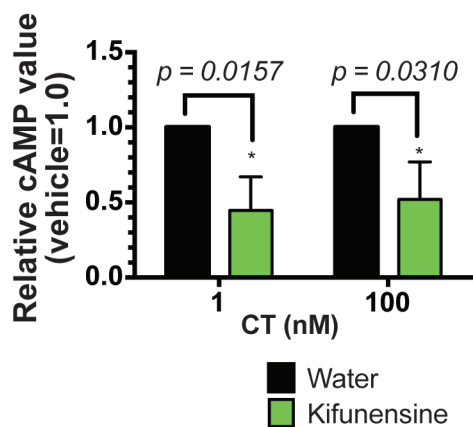

| Kifunensine | Max % Signal |
|-------------|--------------|
| 1 nM CT     | 45 $\pm$ 22% |
| 100 nM CT   | 52 $\pm$ 25% |

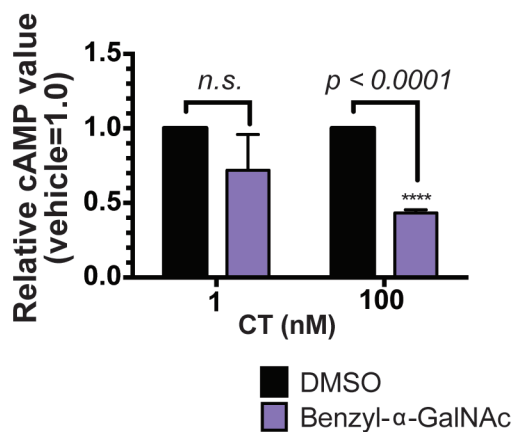

| Benzyl- $\alpha$ -GalNAc | Max % Signal |
|--------------------------|--------------|
| 1 nM CT                  | 72 $\pm$ 24% |
| 100 nM CT                | 43 $\pm$ 2%  |

Figure 9 - figure supplement 2
