# Supplementary figures and images for: Fucosylation and protein glycosylation create functional receptors for cholera toxin
Source: eLife journal article supplement (doi:10.7554/elife.09545), 2015-10-29

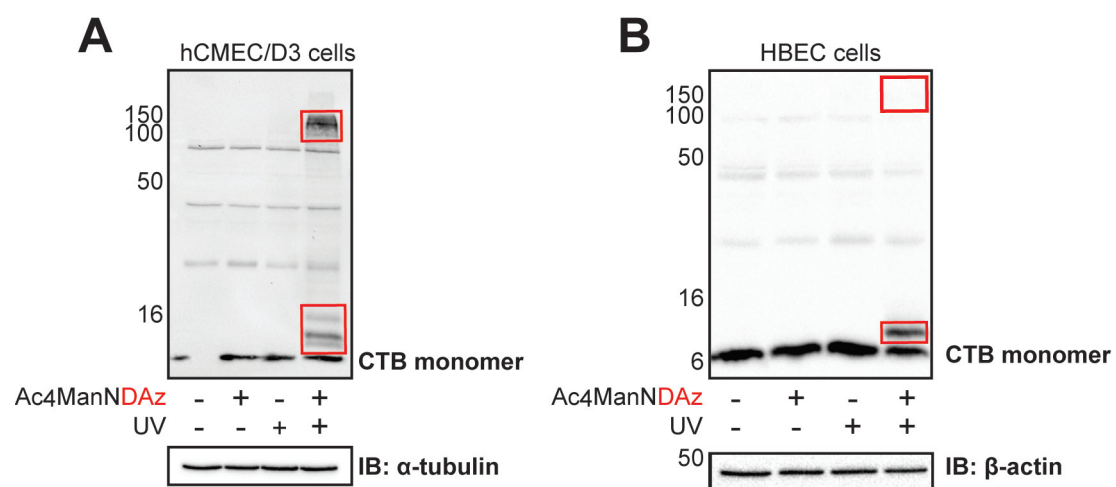

Figure 1 - figure supplement 1

Supplement: supp [file elife_poa_e09545_Figure_1_figure_supplement_1.pdf › elife_poa_e09545_Figure_1_figure_supplement_1.pdf]

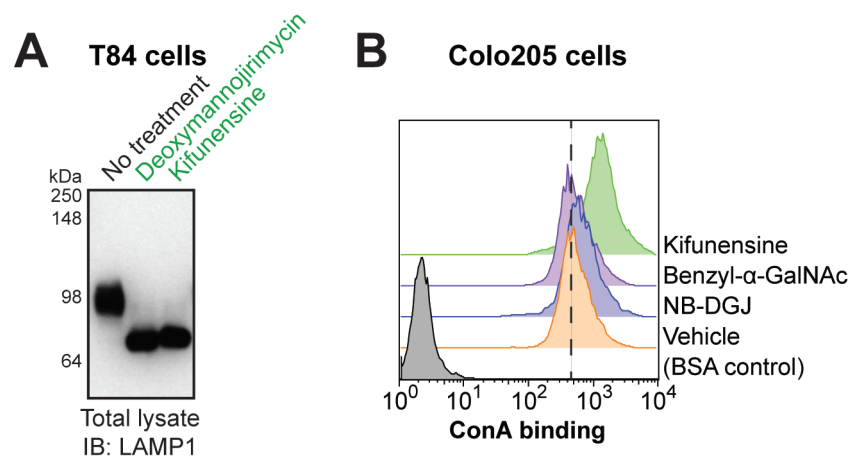

Figure 2 - figure supplement 1

Supplement: supp [file elife_poa_e09545_Figure_2_figure_supplement_1.pdf › elife_poa_e09545_Figure_2_figure_supplement_1.pdf]

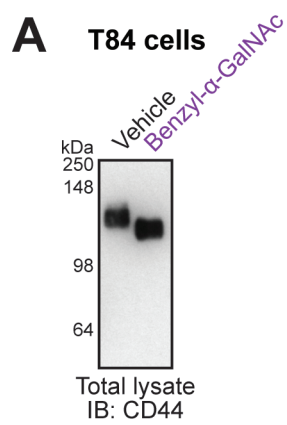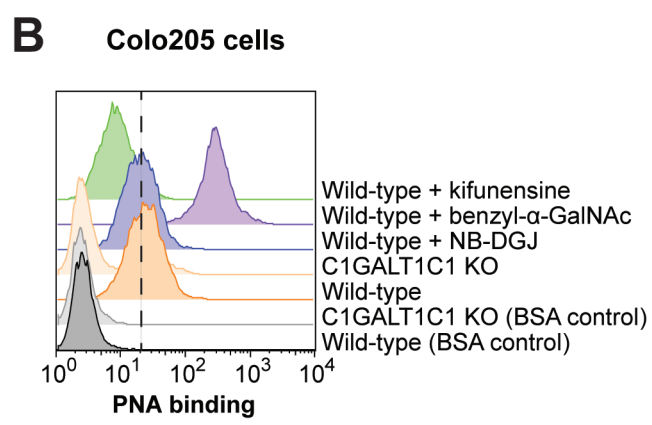

**Figure 2 - figure supplement 2**

Supplement: supp [file elife_poa_e09545_Figure_2_figure_supplement_2.pdf › elife_poa_e09545_Figure_2_figure_supplement_2.pdf]

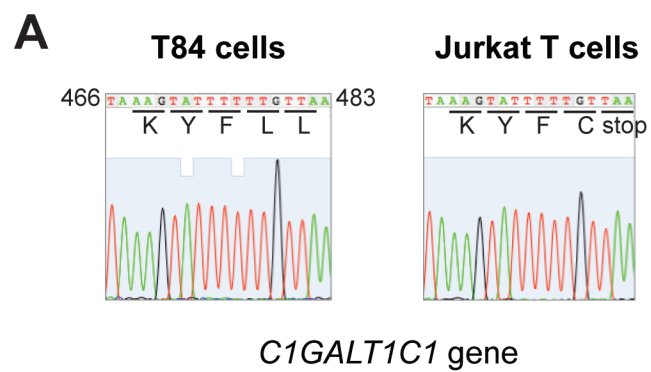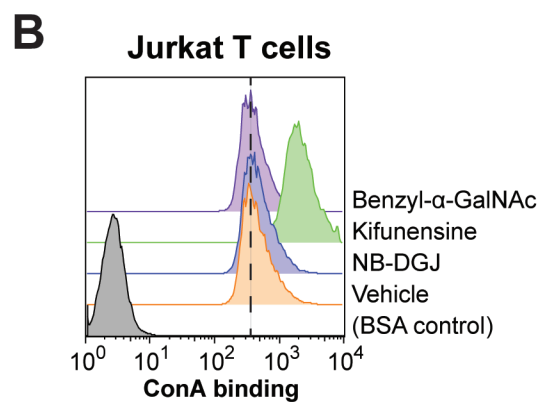

**Figure 4 - figure supplement 1**

Supplement: supp [file elife_poa_e09545_Figure_4_figure_supplement_1.pdf › elife_poa_e09545_Figure_4_figure_supplement_1.pdf]

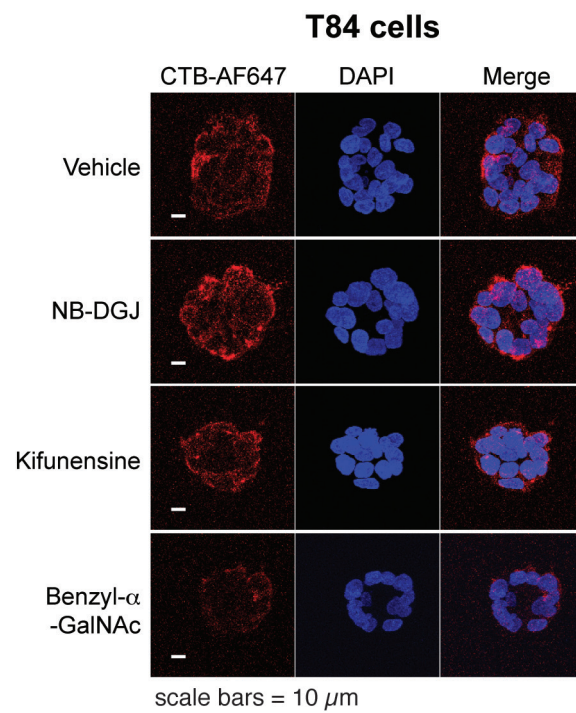

**Figure 4 - figure supplement 2**

Supplement: supp [file elife_poa_e09545_Figure_4_figure_supplement_2.pdf › elife_poa_e09545_Figure_4_figure_supplement_2.pdf]

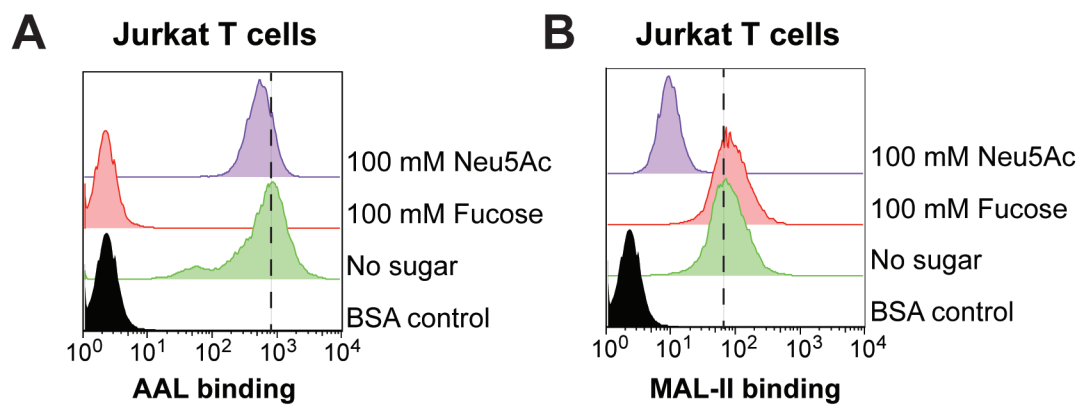

Figure 6 - figure supplement 1

Supplement: supp [file elife_poa_e09545_Figure_6_figure_supplement_1.pdf › elife_poa_e09545_Figure_6_figure_supplement_1.pdf]

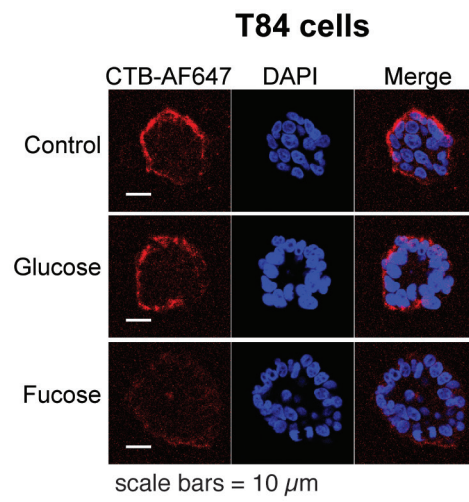

**Figure 6 - figure supplement 2**

Supplement: supp [file elife_poa_e09545_Figure_6_figure_supplement_2.pdf › elife_poa_e09545_Figure_6_figure_supplement_2.pdf]

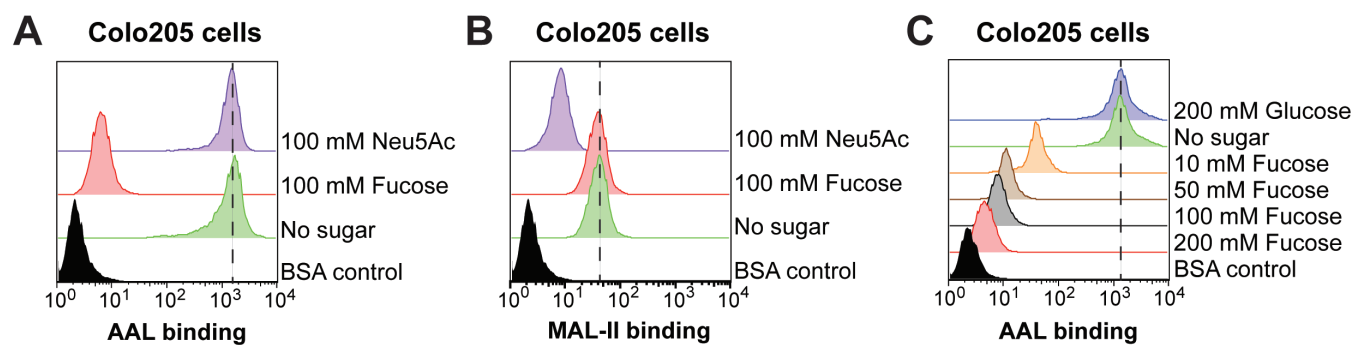

**Figure 6 - figure supplement 3**

Supplement: supp [file elife_poa_e09545_Figure_6_figure_supplement_3.pdf › elife_poa_e09545_Figure_6_figure_supplement_3.pdf]

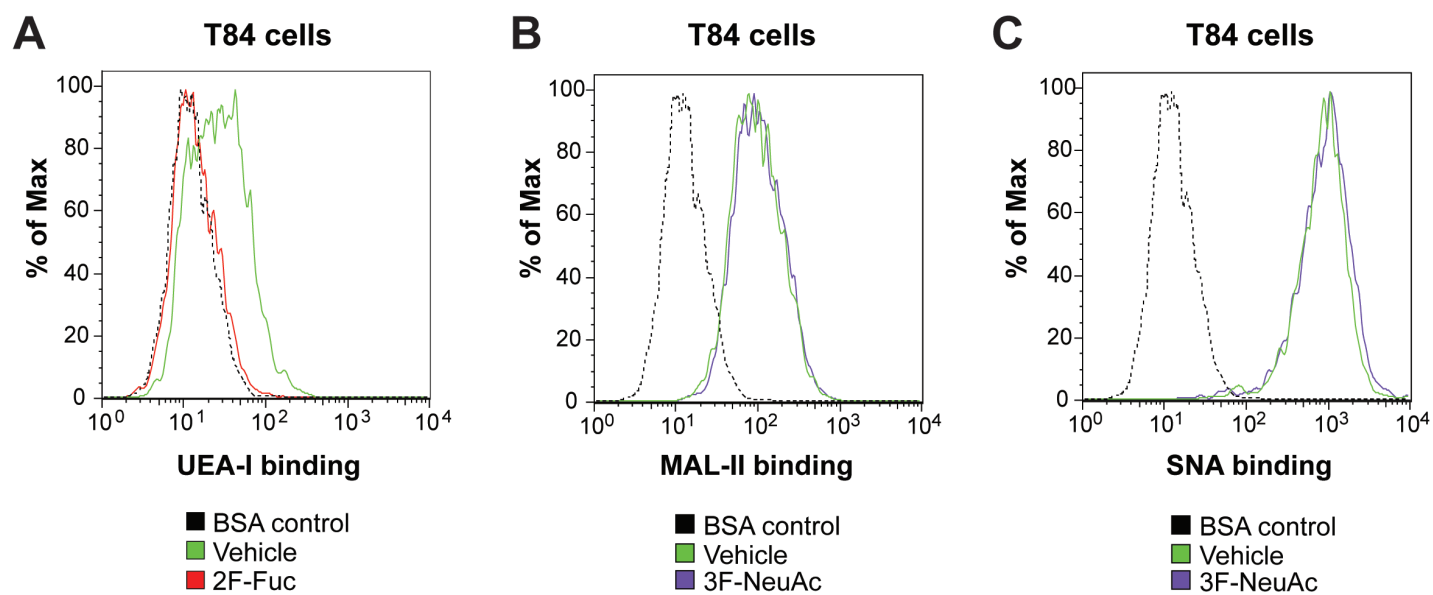

Figure 8 - figure supplement 1

Supplement: supp [file elife_poa_e09545_Figure_8_figure_supplement_1.pdf › elife_poa_e09545_Figure_8_figure_supplement_1.pdf]

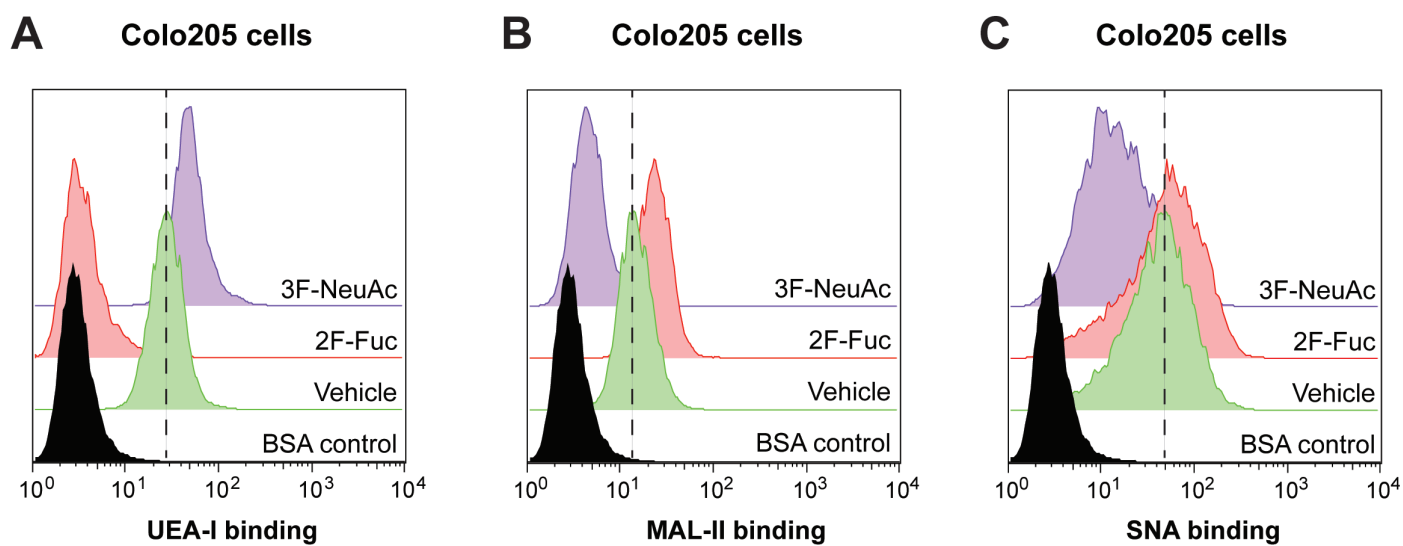

**Figure 8 - figure supplement 2**

Supplement: supp [file elife_poa_e09545_Figure_8_figure_supplement_2.pdf › elife_poa_e09545_Figure_8_figure_supplement_2.pdf]

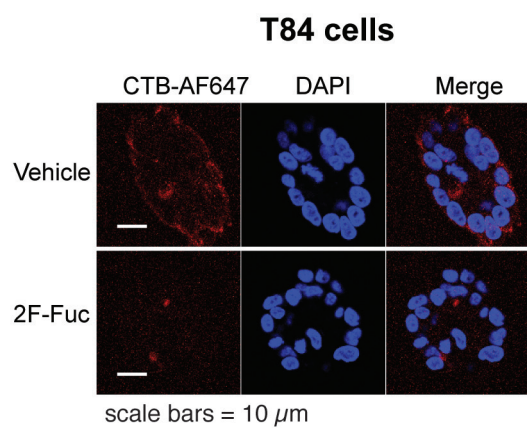

**Figure 8 - figure supplement 3**

Supplement: supp [file elife_poa_e09545_Figure_8_figure_supplement_3.pdf › elife_poa_e09545_Figure_8_figure_supplement_3.pdf]

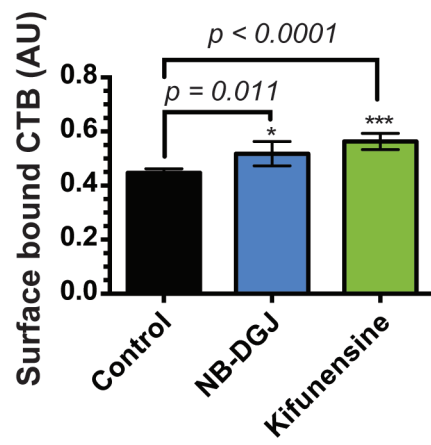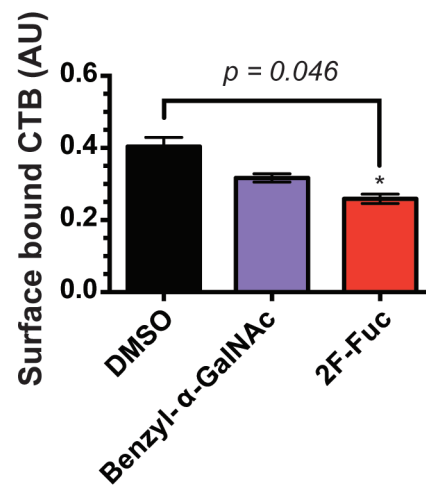

Figure 9 - figure supplement 1

Supplement: supp [file elife_poa_e09545_Figure_9_figure_supplement_1.pdf › elife_poa_e09545_Figure_9_figure_supplement_1.pdf]

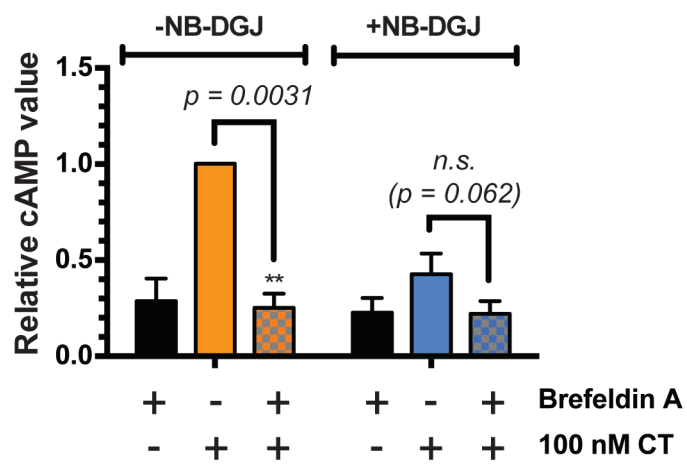

Figure 9 - figure supplement 3

Supplement: supp [file elife_poa_e09545_Figure_9_figure_supplement_3.pdf › elife_poa_e09545_Figure_9_figure_supplement_3.pdf]
